# Supplementary material for: Increased blood BACE1 activity as a potential common pathogenic factor of vascular dementia and late onset Alzheimer's disease
Source: PubMed Central journal article supplement (PMC7486910; doi:10.1038/s41598-020-72168-3), 2020-09-11
Supplement: 41598_2020_72168_MOESM1_ESM.pdf [file 41598_2020_72168_MOESM1_ESM.pdf]

**Increased blood BACE1 activity as a potential common pathogenic factor of  
vascular dementia and late onset Alzheimer's disease**

**Giovanni Zuliani, PhD, Alessandro Trentini, PhD, Valentina Rosta, MS, Remo  
Guerrini, PhD, Salvatore Pacifico, PhD, Stefania Bonazzi, MD, Anna Guiotto, MS,  
Angelina Passaro, MD, Davide Seripa, PhD, Giuseppe Valacchi, PhD , Carlo Cervellati,  
PhD**

**Table S1.** Levels of serum BACE1 activity in controls, Frontotemporal Dementias, Lewy Body disease/Parkinson’s dementia, and other dementias after exclusion of younger controls.

| <b>Characteristics</b> | <b>CONTROLS<br/>(n:82)</b> | <b>Frontotemporal<br/>Dementia<br/>(n:13)</b> | <b>Lewy Body disease<br/>/Parkinson’s dementia<br/>(n:13)</b> | <b>OTHER<br/>DEMENTIAS*<br/>(n:30)</b> |
|------------------------|----------------------------|-----------------------------------------------|---------------------------------------------------------------|----------------------------------------|
| <b>Age (years)</b>     | 79 ± 4                     | 74 ± 6 <sup>a,b</sup>                         | 78 ± 5                                                        | 78 ± 5                                 |
| <b>BACE1 (kU/L)</b>    | 16 (13-20)                 | 15 (13-17)                                    | 19 (12-20)                                                    | 18 (15-23)                             |

Continuous variables are expressed as mean ± SEM or median

*Post-hoc test:* <sup>a</sup> p < 0.05 vs controls; <sup>b</sup> p < 0.05 vs other dementias

\*The group includes: 8 condition related to psychiatric conditions, 5 neoplasm/metastasis, 2 hydrocephalus, 2 Fahr’s syndrome, 2 alcohol related, 1 post syphilis, 1 hypothyroidism, 9 not defined

**Table S2.** Levels of serum BACE1 activity in controls, LOAD, VAD, MIXED, and other dementias in women and men.

|                                 | <b>CONTROLS</b> | <b>LOAD</b>             | <b>VAD</b>              | <b>MIXED</b>            | <b>OTHER<br/>DEMENTIAS</b> |
|---------------------------------|-----------------|-------------------------|-------------------------|-------------------------|----------------------------|
| <b>- WOMEN</b>                  |                 |                         |                         |                         |                            |
| <b>BACE1 (kU/L)<sup>#</sup></b> | 16 (13-20)      | 21 (16-27) <sup>a</sup> | 23 (19-31) <sup>a</sup> | 21 (17-29) <sup>a</sup> | 17 (15-21) <sup>c,d</sup>  |
| <b>- MEN</b>                    |                 |                         |                         |                         |                            |
| <b>BACE1 (kU/L)<sup>#</sup></b> | 14 (12-17)      | 22 (17-26) <sup>a</sup> | 22 (17-26) <sup>a</sup> | 18 (16-24) <sup>a</sup> | 18 (14-20)                 |

Continuous variables are expressed as mean  $\pm$  SEM or median

*Post-hoc test:* <sup>a</sup>p < 0.05 vs controls; <sup>c</sup>p < 0.05 vs VAD; <sup>d</sup>p < 0.05 vs MIXED

**Table S3.** Odds Ratios (95%C.I.) for diagnosis of LOAD, VAD or MIXED dementia in subjects with high levels (IV quartile, cut-off: 18.3 kU/L) of serum BACE1 activity.

|              |                     | <b>Adjusted for age<br/>and gender</b> |
|--------------|---------------------|----------------------------------------|
| <b>LOAD</b>  | 5.91 (3.78-9.22) *  | 5.25 (3.22-8.56) *                     |
| <b>VAD</b>   | 8.64 (3.94-16.92) * | 5.69 (2.37-11.65) *                    |
| <b>MIXED</b> | 4.40 (2.74-7.18) *  | 5.25 (3.22-8.56) *                     |

\*p<0.001

**Table S4.** Area under curve (AUC), sensitivity and specificity for ROC curves calculated at the optimal cutoff, of serum BACE1 to discriminate Controls from LOAD, VAD or MIXED

|                                   | <b>Cut-off<br/>(kU/L)</b> | <b>SE (%)</b> | <b>SP (%)</b> | <b>p value</b> | <b>AUC<br/>95% CI</b> |
|-----------------------------------|---------------------------|---------------|---------------|----------------|-----------------------|
| <b>CONTROLS vs LOAD</b>           | >16.9                     | 73            | 70            | <0.0001        | 0.772 (0.711-0.809)   |
| <b>CONTROLS vs VAD</b>            | >18.0                     | 85            | 75            | <0.0001        | 0.831 (0.748-0.897)   |
| <b>CONTROLS vs MIXED</b>          | >17.0                     | 74            | 71            | <0.0001        | 0.771 (0.723-0.825)   |
| <b>CONTROLS vs LOAD+VAD+MIXED</b> | >16.9                     | 75            | 70            | <0.0001        | 0.773 (0.732-0.813)   |

Abbreviations: SE, sensitivity; SP, specificity; AUC, area under the curve; CI, Confidence interval
